# Supplementary material
Source: PubMed Central journal article supplement (PMC7012712)
Supplement: NIHMS1543233-supplement-1.pdf [file NIHMS1543233-supplement-1.pdf]

**Table S1. Demographic, Clinical, and Procedural Characteristics of the PRESERVE Trial and Sub-Study**

|                                                                  | <b>Sub-Study<br/>Participants<br/>(n=922)</b> | <b>Overall PRESERVE<br/>Participants<br/>(n=4993)</b> |
|------------------------------------------------------------------|-----------------------------------------------|-------------------------------------------------------|
| <b>Demographic</b>                                               |                                               |                                                       |
| Age-years, mean $\pm$ sd                                         | 70 $\pm$ 8                                    | 70 $\pm$ 8                                            |
| Male sex, no. (%)                                                | 896 (97%)                                     | 4671 (94%)                                            |
| Race/Ethnicity, no. (%)                                          |                                               |                                                       |
| White                                                            | 718 (78%)                                     | 3893 (78%)                                            |
| Black                                                            | 144 (16%)                                     | 570 (11%)                                             |
| Other                                                            | 26 (3%)                                       | 349 (7%)                                              |
| Hispanic                                                         | 32 (3%)                                       | 181 (4%)                                              |
| <b>Clinical</b>                                                  |                                               |                                                       |
| Weight –kg, mean $\pm$ sd                                        | 100 $\pm$ 22                                  | 98 $\pm$ 22                                           |
| Median baseline serum creatinine (IQR) -mg/dL                    | 1.5 (1.3-1.7)                                 | 1.5 (1.3-1.8)                                         |
| UACR Categories, no. (%)                                         |                                               |                                                       |
| <30                                                              | 371 (43%)                                     | 1723/4515(38%)                                        |
| 30-300                                                           | 286 (33%)                                     | 1637/4515 (36%)                                       |
| >300                                                             | 205 (24%)                                     | 1155/4515 (26%)                                       |
| Median baseline eGFR (IQR), mL/min                               | 48 (40-57)                                    | 50 (41-59)                                            |
| Diabetes, no. (%)                                                | 760 (82%)                                     | 4041 (81%)                                            |
| <b>Procedural</b>                                                |                                               |                                                       |
| Coronary Procedure, no. (%)                                      | 812 (88%)                                     | 4466/4937 (90%)                                       |
| Percutaneous Intervention, no. (%)                               | 255 (28%)                                     | 1406/4837 (29%)                                       |
| Left ventricular end diastolic pressure - mmHg,<br>mean $\pm$ sd | 19 $\pm$ 8                                    | 18 $\pm$ 8                                            |
| Trial arm, no. (%)                                               |                                               |                                                       |
| Saline + Placebo                                                 | 211 (23%)                                     | 1244 (25%)                                            |
| Saline + Acetylcysteine                                          | 236 (26%)                                     | 1238 (25%)                                            |
| Sodium Bicarbonate + Placebo                                     | 242 (26%)                                     | 1254 (25%)                                            |
| Sodium Bicarbonate + Acetylcysteine                              | 233 (25%)                                     | 1257 (25%)                                            |

**Table S2. Creatinine Corrected Urine Pre-Angiography Biomarkers by MAKE-D and CA-AKI Status**

|        | Median (IQR) Creatinine Corrected Urine Biomarkers |                         |                    |                   |                         |                         |                    |                   |
|--------|----------------------------------------------------|-------------------------|--------------------|-------------------|-------------------------|-------------------------|--------------------|-------------------|
|        | MAKE-D                                             | No MAKE-D               | Unadjusted P-value | Adjusted* P-value | CA-AKI                  | No CA-AKI               | Unadjusted P-value | Adjusted* P-value |
| KIM-1  | 18.11<br>(12.39, 41.31)                            | 16.14<br>(8.55, 26.29)  | 0.009              | 0.1               | 16.14<br>(10.26, 28.05) | 16.18<br>(8.63, 26.62)  | 0.48               | 0.4               |
| NGAL   | 0.46<br>(0.16, 1.45)                               | 0.23 (0.12, 0.49)       | 0.008              | 0.2               | 0.27<br>(0.13, 0.43)    | 0.24<br>(0.12, 0.51)    | 0.91               | 0.6               |
| IL-18  | 0.37<br>(0.23, 0.70)                               | 0.23 (0.14, 0.36)       | <0.001             | 0.002             | 0.24<br>(0.13, 0.38)    | 0.24<br>(0.15, 0.37)    | 0.70               | 0.5               |
| MCP-1  | 3.30<br>(2.00, 5.85)                               | 2.18 (1.47, 3.23)       | <0.001             | 0.03              | 2.21<br>(1.63, 3.26)    | 2.20<br>(1.46, 3.40)    | 0.74               | 0.9               |
| UMOD   | 28.73<br>(14.09, 38.97)                            | 25.43<br>(15.21, 49.22) | 0.94               | 0.9               | 31.62<br>(16.34, 56.82) | 25.02<br>(15.12, 48.15) | 0.08               | 0.1               |
| YKL-40 | 9.50<br>(2.95, 44.48)                              | 4.12 (1.42, 11.23)      | <0.001             | 0.008             | 4.33<br>(1.82, 16.80)   | 4.19<br>(1.51, 11.94)   | 0.71               | 0.9               |

\*Adjusted for Urine Albumin-to-Creatinine Ratio and baseline eGFR

**Table S3. Areas Under the Curve for Pre-Angiography Plasma and Urine Biomarkers for MAKE-D and CA-AKI**

| <b>Biomarker</b> | <b>MAKE-D<br/>AUC (95% CI)</b> | <b>CA-AKI<br/>AUC (95% CI)</b> |
|------------------|--------------------------------|--------------------------------|
| Plasma IL18      | 0.53 (0.44, 0.61)              | 0.56 (0.49, 0.63)              |
| Plasma KIM1      | 0.65 (0.58, 0.72)              | 0.61 (0.55, 0.67)              |
| Plasma MCP1      | 0.50 (0.42, 0.58)              | 0.47 (0.40, 0.55)              |
| Plasma NGAL      | 0.62 (0.55, 0.70)              | 0.49 (0.42, 0.57)              |
| Plasma UMOD      | 0.39 (0.32, 0.47)              | 0.46 (0.39, 0.53)              |
| Plasma YKL40     | 0.66 (0.59, 0.73)              | 0.53 (0.46, 0.60)              |
| Urine IL18       | 0.62 (0.54, 0.71)              | 0.49 (0.42, 0.57)              |
| Urine KIM1       | 0.58 (0.50, 0.66)              | 0.50 (0.43, 0.56)              |
| Urine MCP1       | 0.61 (0.53, 0.69)              | 0.46 (0.40, 0.53)              |
| Urine NGAL       | 0.61 (0.53, 0.69)              | 0.47 (0.40, 0.54)              |
| Urine UMOD       | 0.47 (0.39, 0.55)              | 0.54 (0.48, 0.61)              |
| Urine YKL40      | 0.65 (0.56, 0.73)              | 0.50 (0.43, 0.57)              |

**Table S4. BioPET Analysis of Pre-Angiography Plasma KIM-1**

| Percent of Patients Screened from Trial | Event Rate Among Biomarker-Positive Patients | Sample Size | Number Needed to Screen | Total Screened | Total Costs for Screening and Patients in Trial (in millions)* | Percent Reduction in Total Cost |
|-----------------------------------------|----------------------------------------------|-------------|-------------------------|----------------|----------------------------------------------------------------|---------------------------------|
| 0%                                      | 0.09                                         | 7376        | 1                       | 7376           | 73.76                                                          | 0%                              |
| 5%                                      | 0.09                                         | 7121        | 1.1                     | 7495           | 74.95                                                          | -1.6%                           |
| 10%                                     | 0.09                                         | 6871        | 1.1                     | 7635           | 72.53                                                          | 1.7%                            |
| 15%                                     | 0.1                                          | 6640        | 1.2                     | 7812           | 70.31                                                          | 4.7%                            |
| 20%                                     | 0.1                                          | 6422        | 1.2                     | 8027           | 68.23                                                          | 7.5%                            |
| 25%                                     | 0.1                                          | 6217        | 1.3                     | 8289           | 66.32                                                          | 10.1%                           |
| 30%                                     | 0.11                                         | 5998        | 1.4                     | 8568           | 64.26                                                          | 12.9%                           |
| 35%                                     | 0.11                                         | 5795        | 1.5                     | 8916           | 62.41                                                          | 15.4%                           |
| 40%                                     | 0.11                                         | 5593        | 1.7                     | 9322           | 60.59                                                          | 17.9%                           |
| 45%                                     | 0.12                                         | 5390        | 1.8                     | 9799           | 58.80                                                          | 20.3%                           |
| 50%                                     | 0.12                                         | 5191        | 2                       | 10382          | 57.10                                                          | 22.6%                           |
| 55%                                     | 0.12                                         | 4986        | 2.2                     | 11079          | 55.40                                                          | 24.9%                           |
| 60%                                     | 0.13                                         | 4752        | 2.5                     | 11879          | 53.46                                                          | 27.5%                           |
| 65%                                     | 0.14                                         | 4529        | 2.9                     | 12939          | 51.75                                                          | 29.8%                           |
| 70%                                     | 0.14                                         | 4300        | 3.3                     | 14333          | 50.17                                                          | 32%                             |
| 75%                                     | 0.15                                         | 4041        | 4                       | 16165          | 48.49                                                          | 34.3%                           |
| 80%                                     | 0.16                                         | 3777        | 5                       | 18885          | 47.21                                                          | 36%                             |
| 85%                                     | 0.17                                         | 3476        | 6.7                     | 23176          | 46.35                                                          | 37.2%                           |
| 90%                                     | 0.19                                         | 3139        | 10                      | 31390          | 47.08                                                          | 36.2%                           |
| 95%                                     | 0.21                                         | 2628        | 20                      | 52569          | 52.57                                                          | 28.7%                           |

\* Total costs calculated based on an estimated screening cost of \$500 and a retention cost for each patient of \$10,000

**Table S5. BioPET Analysis of Pre-Angiography Plasma YKL-40**

| Percent of Patients Screened from Trial | Event Rate Among Biomarker-Positive Patients | Sample Size | Number Needed to Screen | Total Screened | Total Costs for Screening and Patients in Trial (in millions)* | Percent Reduction in Total Cost |
|-----------------------------------------|----------------------------------------------|-------------|-------------------------|----------------|----------------------------------------------------------------|---------------------------------|
| 0%                                      | 0.09                                         | 7376        | 1                       | 7376           | 73.76                                                          | 0%                              |
| 5%                                      | 0.09                                         | 7070        | 1.1                     | 7442           | 74.42                                                          | -0.9%                           |
| 10%                                     | 0.09                                         | 6805        | 1.1                     | 7561           | 71.83                                                          | 2.6%                            |
| 15%                                     | 0.1                                          | 6557        | 1.2                     | 7714           | 69.43                                                          | 5.9%                            |
| 20%                                     | 0.1                                          | 6325        | 1.2                     | 7906           | 67.20                                                          | 8.9%                            |
| 25%                                     | 0.1                                          | 6091        | 1.3                     | 8121           | 64.97                                                          | 11.9%                           |
| 30%                                     | 0.11                                         | 5860        | 1.4                     | 8371           | 62.78                                                          | 14.9%                           |
| 35%                                     | 0.11                                         | 5647        | 1.5                     | 8687           | 60.81                                                          | 17.6%                           |
| 40%                                     | 0.12                                         | 5425        | 1.7                     | 9042           | 58.78                                                          | 20.3%                           |
| 45%                                     | 0.12                                         | 5202        | 1.8                     | 9458           | 56.75                                                          | 23.1%                           |
| 50%                                     | 0.12                                         | 4992        | 2                       | 9984           | 54.91                                                          | 25.6%                           |
| 55%                                     | 0.13                                         | 4774        | 2.2                     | 10609          | 53.04                                                          | 28.1%                           |
| 60%                                     | 0.13                                         | 4565        | 2.5                     | 11413          | 51.36                                                          | 30.4%                           |
| 65%                                     | 0.14                                         | 4343        | 2.9                     | 12407          | 49.63                                                          | 32.7%                           |
| 70%                                     | 0.15                                         | 4103        | 3.3                     | 13676          | 47.87                                                          | 35.1%                           |
| 75%                                     | 0.16                                         | 3865        | 4                       | 15461          | 46.38                                                          | 37.1%                           |
| 80%                                     | 0.16                                         | 3611        | 5                       | 18056          | 45.14                                                          | 38.8%                           |
| 85%                                     | 0.18                                         | 3273        | 6.7                     | 21822          | 43.64                                                          | 40.8%                           |
| 90%                                     | 0.2                                          | 2906        | 10                      | 29061          | 43.59                                                          | 40.9%                           |
| 95%                                     | 0.23                                         | 2442        | 20                      | 48843          | 48.84                                                          | 33.8%                           |

\* Total costs calculated based on an estimated screening cost of \$500 and a retention cost for each patient of \$10,000
